# Supplementary material for: Assessing the drivers of regional trends in solar photovoltaic manufacturing
Source: Royal Society of Chemistry journal article supplement (doi:10.1039/c3ee40701b), 2013-01-01
Supplement: c3ee40701b.xlsx [file c3ee40701b.xlsx]

## Sheet: ESI Table
				2012 (Standard) c-Si Technology			Future, High-Technology Case
		Global (Product & Technology) Parameters
		Cell efficiency		0.164			0.242
		Module efficiency		0.149			0.224
		Wafer/ cell area	m2	0.0236559			0.01488
		Module area	m2	1.96			2.26
		Wafer thickness	microns	180			80
		Kerf loss	microns	130			0
		Polysilicon feedstock price	$/ kg	35			18
		Regional Cost Factors		U.S.	China		U.S.	U.S.	China
		Scenario		2012	2012		Innovation alone	Innovation & Large-scale	Innovation & Large-scale
					Large-scale
		Facility location
		Annual production volume	MWP DC/ year	500	2000		500	2000	2000
		Unskilled Direct Wages	$/ hr	12.0518	3.20885		12.0518	12.0518	3.20885
		Skilled Direct Wages	$/ hr	17.5579	4.67487		17.5579	17.5579	4.67487
		Indirect Salary	$/ yr	61426.1	16355		61426.1	61426.1	16355
		Indirect:Direct Labor Ratio		0.35	0.35		0.35	0.35	0.35
		Benefits on Wage and Salary		0.554296	0.537986		0.554296	0.554296	0.537986
		Working Days per Year	days/ yr	350	350		350	350	350
		Working Hours per Day	hrs/ day	24	24		24	24	24
		Capital Recovery Rate (W.A.C.C.)		0.0857433	0.128314		0.062	0.062	0.086
		Equipment Recovery Life	years	10	10		10	10	10
		Building Recovery Life	years	30	30		30	30	30
		Working Capital Period	months	3	3		3	3	3
		Price of Electricity	$/ kWh	0.0692	0.022		0.0692	0.0692	0.077
		Price of Natural Gas	$/ m3	0.000509703	0.000509703		0.000509703	0.000509703	0.000509703
		Price of Building Space	$/ m2	80	0		80	80	0
		Price of CR10K Building Space	$/ m2	200	0		200	200	0
		Price of CR1K Building Space	$/ m2	500	0		500	500	0
		Price of CR100Building Space	$/ m2	5000	0		5000	5000	0
		Expected inflation		0.029	0.1		0.029	0.029	0.032
		Equipment Discount		0	0.5		0.5	0.5	0.5
		Corporate Tax Rate	effective	0.28	0.15		0.28	0.28	0.21
		SG&A (including freight)	%-revenues	0.0716237	0.0716237		0.0716237	0.0716237	0.0716237
		R&D	%-revenues	0.00907821	0.00907821		0.00907821	0.00907821	0.00907821
		Tier 1 Materials Discounts		0	0.15		0.1	0.15	0.15
		Tier 2 Materials Discounts		0	0.25		0	0.25	0.25
		Ingot and Wafer Production
		Slurry costs	$/ WP DC	0.0311988	0.026519		0.0155794	0.0140215	0.0132425
		Saw-wire costs	$/ WP DC	0.0272215	0.0231382		0.0157809	0.0142028	0.0134138
		Effective-polysilicon utilization	grams/ WP DC	5.15995	5.17744		0.860999	0.873673	0.873673
		Other material costs	$/ WP DC	0.0047394	0.00402849		0.00157775	0.00141997	0.00134108
		Installed equipment capex	$/ WP DC	0.398333	0.186401		0.12786	0.0551232	0.0535141
		Building and facility capex	$/ WP DC	0.020959	0.00932167		0.00715437	0.00332637	0.00267731
		Direct-labor content	ppl/ MWP DC	1.1224	1.08927		0.4144	0.364467	0.364467
		Overhead-labor content	ppl/ MWP DC	0.39284	0.381243		0.14504	0.127563	0.127563
		Electricity requirements	kWh/ WP DC	0.268021	0.270766		0.0752054	0.0752077	0.0752074
		Cell Production
		Metallization	$/ WP DC	0.0895633	0.0857106		0.0478293	0.0430463	0.0406549
		Other materials	$/ WP DC	0.0505826	0.036546		0.043873	0.0394857	0.0372921
		Installed equipment capex	$/ WP DC	0.261885	0.218787		0.51807	0.474576	0.44603
		Building and facility capex	$/ WP DC	0.119894	0		0.163655	0.152479	0
		Direct-labor content	ppl/ MWP DC	0.128405	0.642024		0.148735	0.148735	0.743673
		Overhead-labor content	ppl/ MWP DC	0.0449417	0.224709		0.0520571	0.0520571	0.260285
		Electricity requirements	kWh/ WP DC	0.160872	0.160872		0.317812	0.317812	0.317812
		Module Production
		Effective (low-iron, tempered) glass price	$/ m2	16.4078	12.3059		16.4078	12.3059	12.3059
		Effective encapsulant film price	$/ m2	8.5392	8.5392		8.5392	8.5392	8.5392
		Effective backsheet film price	$/ m2	8.35129	8.35129		8.35129	8.35129	8.35129
		Effective aluminum frame price	$/ m	3.83519	2.8764		3.83519	2.8764	2.8764
		Other materials costs	$/ module	70.3185	54.3463		80.6985	62.398	62.398
		Installed equipment capex	$/ WP DC	0.146434	0.0731112		0.133822	0.0633414	0.0633414
		Building and facility capex	$/ WP DC	0.0303537	1.249e-16		0.0274867	0.0133093	0
		Direct-labor content	ppl/ MWP DC	0.12688	0.6266		0.09984	0.08892	0.4446
		Overhead-labor content	ppl/ MWP DC	8.8816e-05	0.000109655		6.9888e-05	1.5561e-05	7.7805e-05
		Electricity requirements	kWh/ WP DC	0.0118458	0.0118458		0.00680904	0.00680904	0.00680904
		Total (poly, wafer, cell, module) Production: c-Si PV
		Total capex	$/ WP DC	0.977859	0.487622		0.978048	0.762155	0.565563
		Energy requirement	kWh/ WP DC	0.440739	0.443484		0.399826	0.399828	0.399828
		Labor content	ppl/ MWP DC	1.81556	2.96395		0.860141	0.781757	1.94067

## Sheet: Fig.2
		U.S. (500 MW/yr)	Cost of Labor	Inflation	Cost of Equity	Provincial Subsidies	Tax Holidays	Cost of Debt	Scale	Material Discounts	Equipment Discounts	China (2,000 MW/yr)
	Wafer costs	0.385365										0.288811
	Wafer margin	0.0676796										0.0640691
	Cell costs	0.257433										0.207588
	Cell margin	0.0579147										0.05387
	Module costs	0.341368										0.244165
	Module margin	0.075892										0.053439
	Cost benefit		0.0671934	0	0	0.0434506	0.00802721	0.00348711	0.0776856	0.0573468	0.0895238
	Cost penalty			0.0442084	0.030246
	Minimum sustainable price-modules	1.18565	1.11846	1.16267	1.19291	1.14946	1.14144	1.13795	1.06026	1.00292	0.913392	0.911942

## Sheet: Fig.3
		U.S. (2,000 MW/yr)	Cost of Labor	Inflation	Cost of Equity	Provincial Subsidies	Tax Holidays	Cost of Debt	Scale	Material Discounts	Equipment Discounts	China (2,000 MW/yr)
	Wafer costs	0.0744828										0.0616668
	Wafer margin	0.00918369										0.0143766
	Cell costs	0.278365										0.25882
	Cell margin	0.0419216										0.0488351
	Module costs	0.201001										0.199154
	Module margin	0.0388889										0.0400536
	Cost benefit		0.0344703	0	0	0.00224391	0.00268223	0	0	0	0
	Cost penalty			0.00710353	0.010484
	Minimum sustainable price-modules	0.643843	0.609373	0.616477	0.626961	0.624717	0.622034	0.622034	0.622034	0.622034	0.622034	0.622906

## Sheet: Fig.4
		(A)		(B)	(C)		(D)
		2011		High Tech.	High Tech.		2011
		U.S.		U.S.	China		China
		(η = 14.9%)		(η = 22.4%)	(η = 22.4%)		(η = 14.9%)
	Wafer costs	0.385365		0.0744828	0.0616668		0.288811
	Wafer margin	0.0676796		0.00918369	0.0143766		0.0640691
	Cell costs	0.257433		0.278365	0.25882		0.207588
	Cell margin	0.0579147		0.0419216	0.0488351		0.05387
	Module costs	0.341368		0.201001	0.199154		0.244165
	Module margin	0.075892	0.757177	0.0388889	0.0400536		0.053439
	Technology leap		0.428474
	Competitive scale
	Price	1.18565		0.643843	0.622906		0.911942
	Cash costs	0.856579		0.424532	0.370229		0.680898

## Sheet: S1 Fig.1
		U.S. (500 MW/yr)	Cost of Labor	Inflation	Cost of Equity	Provincial Subsidies	Tax Holidays	Cost of Debt	Scale	Material Discounts	Equipment Discounts	China (2,000 MW/yr)
	Polysilicon	0.177311										0.177923
	Saw wire	0.0267282										0.022719
	Saw slurry	0.0306335										0.0260384
	Other materials	0.00465352										0.00395549
	Labor	0.049822										0.0135725
	Energy	0.0182107										0.00584775
	Depreciation	0.040522										0.0201109
	Maintenance	0.0374841										0.0186441
	Required margin-wafer manufacturer	0.0676796										0.0640691
	Cost benefit		0.043646			0.0288306			1e-05	0.0214856	0.0604597
	Cost penalty			0.0293379	0.00694255		0.0179773	0.00196306
	Minimum sustainable price	0.453044	0.409398	0.438736	0.445679	0.416848	0.434826	0.436789	0.436779	0.415293	0.354833	0.35288

## Sheet: S1 Fig.2
		U.S. (500 MW/yr)	Cost of Labor	Inflation	Cost of Equity	Provincial Subsidies	Tax Holidays	Cost of Debt	Scale	Material Discounts	Equipment Discounts	China (2,000 MW/yr)
	Metallization	0.0895549										0.0857025
	Other materials	0.0505779										0.0365425
	Labor	0.0227391										0.0297993
	Energy	0.0111313										0.00353885
	Depreciation	0.0694677										0.0437575
	Maintenance	0.0139622										0.00824708
	Required margin-cell manufacturer	0.0579147										0.05387
	Cost benefit		0.0169832		0.0015394	0.00268765		0.0204398	0.0230394	0.00656991	0.00563798
	Cost penalty			0.0119152			0.00840436
	Minimum sustainable price	0.315348	0.298365	0.31028	0.30874	0.306053	0.314457	0.294017	0.270978	0.264408	0.25877	0.261458

## Sheet: S1 Fig.3
		U.S. (500 MW/yr)	Cost of Labor	Inflation	Cost of Equity	Provincial Subsidies	Tax Holidays	Cost of Debt	Scale	Material Discounts	Equipment Discounts	China (2,000 MW/yr)
	Glass	0.11012										0.0825898
	EVA	0.05731										0.05731
	Backsheet	0.0560489										0.0560489
	Jbox	0.0177507										0.0177507
	Other materials	0.0699161										0.0252646
	Labor	0.0047338										0.00621867
	Energy	0.000819731										0.000260608
	Depreciation	0.017597										0.00731112
	Maintenance	0.00707152										0.00292445
	Required margin-module manufacturer	0.075892										0.0765117
	Cost benefit		0.00657367			0.0002901	0.00194914	0.000659733	0.0357905	0.0469964	0.00483729
	Cost penalty			0.00294787	0.00772938
	Minimum sustainable price	0.41726	0.410686	0.413634	0.421363	0.421073	0.419124	0.418464	0.382674	0.335677	0.33084	0.332191

## Sheet: S1 Fig.4
		U.S. (500 MW/yr)	Cost of Labor	Inflation	Cost of Equity	Provincial Subsidies	Tax Holidays	Cost of Debt	Scale	Material Discounts	Equipment Discounts	China (2,000 MW/yr)
	Wafer costs	0.0924222										0.0629707
	Wafer margin	0.0164201										0.0141661
	Cell costs	0.30045										0.236191
	Cell margin	0.0566109										0.0572667
	Module costs	0.233715										0.124367
	Module margin	0.0575587										0.0861946
	Cost benefit		0.0447831	0	0	0.0447055	0.00807062	0.00498748	0.0569331	0.0376792	0.035491
	Cost penalty			0.0297163	0.0233678
	Minimum sustainable price-modules	0.757177	0.712394	0.742111	0.765478	0.720773	0.712702	0.707715	0.650782	0.613103	0.577612	0.581157

## Sheet: S1 Fig.6
				China loan		China loan		U.S. loan
	Date	China (C.P.I.)	U.S. (C.P.I.)	Real interest rate	Amount ($U.S. millions)	Real interest rate	Amount ($U.S. millions)	Real interest rate	Amount ($U.S. millions)
	2008-01-01	0.065	0.041			-0.028169	172
	2008-02-01	0.071	0.043
	2008-03-01	0.087	0.04			-0.0524379	575
	2008-04-01	0.083	0.04
	2008-05-01	0.085	0.039			-0.0368664	400
	2008-06-01	0.077	0.042	-0.0273909	400	-0.0436397	575	-0.0115163	316
	2008-07-01	0.071	0.05	-0.0289449	138	-0.0219421	54	-0.00952381	373
	2008-08-01	0.063	0.056
	2008-09-01	0.049	0.054
	2008-10-01	0.046	0.049
	2008-11-01	0.04	0.037
	2008-12-01	0.024	0.011
	2009-01-01	0.012	0.001			0.0869565
	2009-02-01	0.01	0
	2009-03-01	-0.016	0.002
	2009-04-01	-0.012	-0.004			0.0417004
	2009-05-01	-0.015	-0.007					0.0548842	230
	2009-06-01	-0.014	-0.013
	2009-07-01	-0.017	-0.014
	2009-08-01	-0.018	-0.021
	2009-09-01	-0.012	-0.015
	2009-10-01	-0.008	-0.013
	2009-11-01	-0.005	-0.002
	2009-12-01	0.006	0.018
	2010-01-01	0.019	0.027
	2010-02-01	0.015	0.026
	2010-03-01	0.027	0.021
	2010-04-01	0.024	0.023					0.0215054	250
	2010-05-01	0.028	0.022
	2010-06-01	0.031	0.02
	2010-07-01	0.029	0.011
	2010-08-01	0.033	0.012
	2010-09-01	0.035	0.011
	2010-10-01	0.036	0.011			0.00675676	147.7
	2010-11-01	0.044	0.012
	2010-12-01	0.051	0.011			-0.00333016	31
	2011-01-01	0.046	0.015
	2011-02-01	0.049	0.016			0.0486177	259
	2011-03-01	0.049	0.021					0.0284035	250
	2011-04-01	0.055	0.027
	2011-05-01	0.052	0.032			-0.0114068	125
	2011-06-01	0.055	0.036
	2011-07-01	0.064	0.036			0.00093985	62
	2011-08-01	0.065	0.036			0.00938967	110
	2011-09-01	0.062	0.038
	2011-10-01	0.061	0.039
	2011-11-01	0.055	0.035			0.0146919	236
	2011-12-01	0.042	0.034			0.024952	79
	2012-01-01	0.041	0.03
	2012-02-01	0.045	0.029
	2012-03-01	0.032	0.029

## Sheet: S1 Fig.7
	Relative monthly returns--select PV industry companies and All Country World Index (ACWI)
		Suntech	Trina	Yingli	SunPower	First Solar	ACWI
	2008-05-30	0	0	0	0	0	0
	2008-06-30	-0.119417	-0.318202	-0.226433	-0.120479	0.0197354	-0.08343
	2008-07-31	-0.106781	-0.101828	0.0590452	0.0943318	0.0447548	-0.0271525
	2008-08-29	0.42887	0.188227	0.0682088	0.238416	-0.0294004	-0.023543
	2008-09-30	-0.249739	-0.298165	-0.388118	-0.272886	-0.317152	-0.126833
	2008-10-31	-0.512127	-0.542919	-0.521779	-0.449316	-0.23932	-0.199057
	2008-11-28	-0.512	-0.0934223	-0.218216	-0.110855	-0.131246	-0.0680191
	2008-12-31	0.370023	-0.0231335	0.480583	0.0653614	0.105095	0.0346739
	2009-01-30	-0.195726	-0.130248	-0.0836066	-0.092973	0.0350826	-0.0863493
	2009-02-27	-0.352816	-0.190594	-0.304114	-0.168951	-0.259524	-0.100231
	2009-03-31	0.91954	0.593272	0.547558	-0.147365	0.254965	0.0794465
	2009-04-30	0.27716	0.357006	0.159468	0.151388	0.411379	0.114829
	2009-05-29	0.0944407	0.751768	0.833811	0.060263	0.0160179	0.0952318
	2009-06-30	0.0930233	0.0347194	0.0585938	-0.083362	-0.147617	-0.00721553
	2009-07-31	0.0296753	0.102614	-0.0206642	0.210071	-0.0481504	0.0866849
	2009-08-31	-0.227297	-0.0548478	-0.186888	-0.212733	-0.212514	0.0336665
	2009-09-30	0.0696692	0.204418	0.154773	0.179093	0.257279	0.0440931
	2009-10-30	-0.166447	0.00963631	-0.070626	-0.169957	-0.202342	-0.0161543
	2009-11-30	0.179953	0.434113	0.227116	-0.166868	-0.023128	0.0392087
	2009-12-31	0.112375	0.158652	0.112597	0.145622	0.136764	0.0196479
	2010-01-29	-0.187613	-0.593663	-0.208096	-0.138936	-0.16322	-0.0437817
	2010-02-26	-0.0185048	0.00319197	-0.0750799	-0.0804316	-0.0666372	0.0110711
	2010-03-31	0.0573152	0.109545	0.100173	0.00106667	0.159811	0.0618307
	2010-04-30	-0.0328103	0.0598116	-0.00863422	-0.11561	0.173909	-0.000162655
	2010-05-31	-0.255162	-0.323541	-0.274743	-0.203012	-0.219614	-0.0981942
	2010-06-30	-0.0920792	-0.0125714	0.111354	-0.0854119	0.0130829	-0.0321824
	2010-07-30	0.0839695	0.258102	0.0726916	0.0272727	0.102082	0.0801491
	2010-08-31	-0.221328	0.185833	0.0192308	-0.131939	0.0191311	-0.0368939
	2010-09-30	0.245478	0.170675	0.243486	0.334569	0.152522	0.0935283
	2010-10-29	-0.119295	-0.11332	-0.157514	-0.0555556	-0.0656261	0.0353585
	2010-11-30	-0.159011	-0.165919	-0.155232	-0.143382	-0.107714	-0.0239595
	2010-12-31	0.121849	0.0492832	0.00304569	0.101288	0.0593407	0.0721837
	2011-01-31	0.0599251	0.113151	0.172065	0.0475448	0.187798	0.0149407
	2011-02-28	0.118963	0.0586881	-0.00345423	0.270089	-0.0465131	0.0275344
	2011-03-31	0.0378947	0.0913043	0.117851	0.00410076	0.0912545	-0.00342208
	2011-04-29	-0.0902637	-0.0541169	-0.0286822	0.265461	-0.132243	0.0385869
	2011-05-31	-0.0947603	-0.194454	-0.267358	-0.0290456	-0.109766	-0.0252171
	2011-06-30	-0.0307882	-0.0230937	0.00326797	-0.0821462	0.0645473	-0.0174763
	2011-07-29	-0.0673443	-0.20116	-0.213898	0.0155199	-0.106147	-0.0173191
	2011-08-31	-0.284741	-0.113345	-0.118785	-0.281712	-0.15436	-0.0752605
	2011-09-30	-0.56	-0.617128	-0.514107	-0.426241	-0.367774	-0.0965166
	2011-10-31	0.186147	0.327303	0.309677	0.238566	-0.212625	0.10615
	2011-11-30	-0.0948905	-0.0086741	0.0640394	-0.219561	-0.0383765	-0.032149
	2011-12-30	-0.108871	-0.165	-0.12037	-0.203325	-0.294609	-0.00312864
	2012-01-31	0.470588	0.203593	0.113158	0.0995185	0.25237	0.0572602
	2012-02-29	-0.0461538	-0.0422886	-0.115839	0.0992701	-0.236045	0.0482221

[truncated: 2 more sheets: S1 Fig.8, S1 Fig.9]
